# Supplementary material
Source: PubMed Central journal article supplement (PMC4329266)
Supplement: NIHMS627775-supplement-11095_2014_1511_MOESM1_ESM.pdf [file NIHMS627775-supplement-11095_2014_1511_MOESM1_ESM.pdf]

## SUPPLEMENTARY INFORMATION

### *Calculation of Binding Site Volume*

POVME was used to calculate the binding site volumes. Grid points were generated every 1.0Å and the center of the docking box was selected as the center of the InclusionBox with an edge length of 18Å (approximate length of the docking box used for docking). Discontiguous points were removed by setting the ContiguousPointsCriteria to 3. The ContiguousSeedBox was set with the same center as used in the initial points but the box was reduced to have an edge length of 5Å.

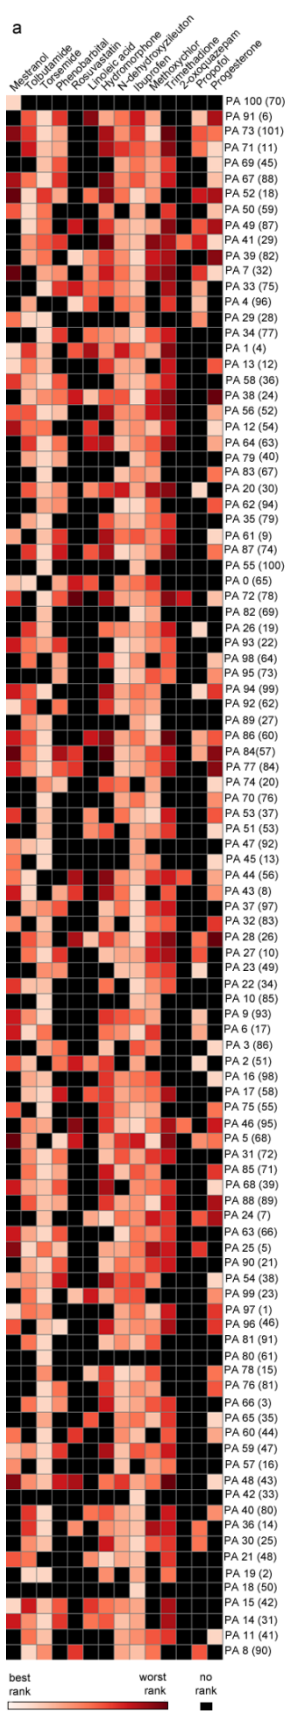

**Supplementary Figure 1.** SoM prediction using AutoDock Vina and the 14 ligand set in the pseudo-apo ensemble. The structure rank has been denoted.

**Supplementary Table 1.** Ranking of CYP2C9 SoMs by the methods tested in this study.

| Substrate Name            | Data Set <sup>a</sup> | Rank           |                |                       |                      |                     |                       |                      |
|---------------------------|-----------------------|----------------|----------------|-----------------------|----------------------|---------------------|-----------------------|----------------------|
|                           |                       | SMARTCyp alone | Static Docking |                       |                      | Pseudo-Apo Ensemble |                       |                      |
|                           |                       |                | Vina Alone     | Vina +SMARTCyp + QSAR | Vina+SMARTCyp + QSAR | Vina Alone          | Vina +SMARTCyp + QSAR | Vina+SMARTCyp + QSAR |
| Flurbiprofen              | T                     | 2              | 4              | 1                     | 1                    | 1                   | 1                     | 1                    |
| Naproxen                  | N                     | 1              | n/a            | n/a                   | n/a                  | 1                   | 1                     | 1                    |
| Zolpidem                  | T                     | 1              | 3              | 1                     | 5                    | 2                   | 2                     | 1                    |
| Tienilic acid             | T                     | 2              | 2              | 2                     | 3                    | 2                   | 3                     | 1                    |
| GV150526                  | T                     | 2              | 1              | 1                     | 1                    | 4                   | 1                     | 1                    |
| Fluvistatin               | N                     | 7              | 2              | 3                     | 1                    | 1                   | 1                     | 2                    |
| Indomethacin              | N                     | 1              | 5              | 1                     | 1                    | 1                   | 1                     | 1                    |
| Tolbutamide               | F,N                   | 1              | 1              | 1                     | 1                    | 3                   | 2                     | 1                    |
| Desogestrel               | N                     | 1              | n/a            | n/a                   | n/a                  | 1                   | 1                     | 1                    |
| Dibenzo[a h]anthracene    | T                     | 1              | 1              | 1                     | 1                    | 1                   | 1                     | 1                    |
| Losartan                  | N                     | 1              | n/a            | n/a                   | n/a                  | 1                   | 1                     | 1                    |
| Piroxicam                 | N                     | 6              | n/a            | n/a                   | n/a                  | 1                   | 1                     | 1                    |
| Mefenamic acid            | N                     | 1              | 4              | 1                     | 1                    | 1                   | 1                     | 1                    |
| Chlorpropamide            | N                     | 8              | n/a            | n/a                   | n/a                  | n/a                 | n/a                   | n/a                  |
| Amitriptyline             | T                     | 1              | 7              | 1                     | 1                    | 1                   | 1                     | 1                    |
| Celecoxib                 | T                     | 1              | n/a            | n/a                   | n/a                  | 5                   | 1                     | 1                    |
| Mestranol                 | F,N                   | 1              | n/a            | n/a                   | n/a                  | 6                   | 1                     | 1                    |
| Etodolac                  | N                     | 4              | n/a            | n/a                   | n/a                  | 10                  | 8                     | 1                    |
| 17 alpha-ethinylestradiol | N                     | 5              | 2              | 1                     | 1                    | 7                   | 2                     | 1                    |
| Galangin                  | T                     | 3              | 1              | 2                     | 1                    | 1                   | 1                     | 1                    |
| Sildenafil                | N                     | 1              | n/a            | n/a                   | n/a                  | 2                   | 1                     | 1                    |
| Aceclofenac               | N                     | 2              | 7              | 1                     | 1                    | 1                   | 1                     | 1                    |
| Tolterodine               | T                     | 15             | 3              | 6                     | 2                    | 1                   | 3                     | 1                    |
| Meloxicam                 | N                     | 1              | n/a            | n/a                   | n/a                  | 3                   | 1                     | 1                    |
| Acenocoumarol             | T                     | 4              | 5              | 3                     | 1                    | 7                   | 2                     | 1                    |
| Methoxychlor              | F,N                   | 1              | n/a            | n/a                   | n/a                  | 1                   | 1                     | 1                    |
| Clozapine                 | N                     | 1              | 5              | 1                     | 1                    | 4                   | 1                     | 1                    |
| Terbinafine               | T                     | 1              | 6              | 1                     | 1                    | 3                   | 1                     | 1                    |
| Tenoxicam                 | N                     | 6              | n/a            | n/a                   | n/a                  | 1                   | 1                     | 1                    |
| Methyl Eugenol            | N                     | 3              | 3              | 3                     | 1                    | 4                   | 3                     | 1                    |
| (s)-lansoprazole          | N                     | 8              | n/a            | n/a                   | n/a                  | 1                   | 2                     | 2                    |
| N-dehydrozileuton         | F,N                   | 6              | 1              | 3                     | 2                    | 1                   | 2                     | 2                    |
| Ibuprofen                 | F,N                   | 4              | 1              | 2                     | 1                    | 2                   | 1                     | 1                    |
| Diclofenac                | T                     | 1              | 3              | 1                     | 1                    | 1                   | 1                     | 1                    |
| Valproic acid             | N                     | 2              | 1              | 1                     | 2                    | 3                   | 2                     | 1                    |
| Arachidonic acid          | N                     | 9              | n/a            | n/a                   | n/a                  | n/a                 | n/a                   | n/a                  |
| Kaempferide               | N                     | 1              | 4              | 1                     | 1                    | 7                   | 3                     | 1                    |
| DMZ                       | T                     | 1              | n/a            | n/a                   | n/a                  | 1                   | 1                     | 1                    |
| Limonene                  | N                     | 2              | 4              | 2                     | 2                    | 2                   | 2                     | 1                    |

|                                    |     |    |     |     |     |     |     |     |
|------------------------------------|-----|----|-----|-----|-----|-----|-----|-----|
| Safrole                            | N   | 2  | 2   | 2   | 1   | 1   | 2   | 1   |
| Warfarin                           | T   | 4  | n/a | n/a | n/a | 1   | 2   | 1   |
| Serotrodast                        | N   | 1  | 1   | 1   | 1   | 10  | 3   | 1   |
| Lornoxicam                         | T   | 5  | n/a | n/a | n/a | 2   | 1   | 1   |
| Fluoxetine                         | N   | 1  | 3   | 1   | 1   | 7   | 1   | 1   |
| Phenytoin                          | T   | 1  | 5   | 1   | 1   | 1   | 1   | 1   |
| Suprofen                           | N   | 2  | 7   | 1   | 1   | 2   | 2   | 1   |
| Zafirlukast                        | N   | 3  | 2   | 2   | 1   | 2   | 2   | 1   |
| Phenprocoumon                      | T   | 3  | 3   | 2   | 1   | 3   | 2   | 1   |
| Ketamine                           | N   | 1  | 10  | 1   | 3   | 12  | 2   | 1   |
| 58C80                              | N   | 11 | 1   | 2   | 1   | 1   | 1   | 1   |
| Delta-9-tetrahydrocannabinol       | N   | 2  | 1   | 1   | 1   | 1   | 1   | 1   |
| Torseamide                         | F,T | 1  | n/a | n/a | n/a | 4   | 1   | 1   |
| Linoleic acid                      | F,N | 6  | 9   | 2   | 1   | 8   | 6   | 1   |
| Hydromorphone                      | F,N | 1  | 7   | 1   | 1   | 4   | 1   | 1   |
| Carvedilol                         | N   | 4  | n/a | n/a | n/a | 13  | 11  | 1   |
| TR-14035                           | N   | 1  | n/a | n/a | n/a | 1   | 1   | 1   |
| Montelukast                        | N   | 22 | 8   | 8   | 3   | 6   | 3   | 1   |
| Hexobarbital                       | T   | 1  | 6   | 1   | 1   | 5   | 1   | 1   |
| Rosuvastatin                       | F,N | 7  | n/a | n/a | 1   | 6   | 3   | 1   |
| Tamoxifen                          | N   | 8  | 1   | 3   | n/a | 2   | 4   | 1   |
| Zopiclone                          | N   | 1  | 8   | 1   | 3   | 1   | 1   | 1   |
| Phenobarbital                      | F,N | 2  | 3   | 2   | 1   | 3   | 1   | 1   |
| s-MTPPA                            | N   | 3  | 9   | 2   | 1   | 1   | 1   | 1   |
| 2-oxoquazepam                      | F,N | 1  | 1   | 1   | 2   | n/a | n/a | n/a |
| rosiglitazone                      | N   | 2  | n/a | n/a | n/a | 1   | 1   | 1   |
| sulfinpyrazone                     | N   | 3  | 1   | 1   | 1   | 1   | 1   | 1   |
| trimethadione sulfate              | F,N | 1  | 3   | 1   | 1   | 1   | 1   | 1   |
| alitretinoin (9-cis-retinoic acid) | N   | 8  | n/a | n/a | n/a | 1   | 2   | 2   |
| flunitrazepam                      | N   | 3  | 1   | 1   | 1   | 5   | 3   | 1   |
| muraglitazar                       | N   | 1  | n/a | n/a | n/a | 2   | 2   | 1   |
| propofol                           | F,N | 16 | n/a | n/a | n/a | 3   | 8   | 2   |
| SCH351125                          | N   | 1  | n/a | n/a | n/a | 4   | 1   | 1   |
| progesterone                       | F,N | 25 | 1   | 8   | 2   | 1   | 8   | 2   |

<sup>a</sup> F= ligand used in optimizing the fitness function in the *SMARTCyp* +*Docking* approach and to rank protein structures in ensemble optimization, N= ligand used in the QSAR training set, and T= ligand used in the QSAR test set.
